# Supplementary material
Source: publisher figshare collection journal article supplement (https://frontiersin.figshare.com/ndownloader/files/17760176)
Supplement: Supplementary file 1 [file 17760176]

**Table S3.** Concentrations (ng g-1 dw) of the 16-EPA priority PAHs in surface sediments from the ports of Cagliari, El Kantaoui, and Heraklion. Each value is the average of three replicate samples collected at each station per each sampling campaign. Sample labels are defined in the text.

| **Sample** | **Compound (molecular weight)** | | | | | | | | | | | | | | | |
| --- | --- | --- | --- | --- | --- | --- | --- | --- | --- | --- | --- | --- | --- | --- | --- | --- |
| **Naph**  **(128)** | **Aceph**  **(152)** | **Ace**  **(154)** | **Fl**  **(166)** | **Phen**  **(178)** | **Ant**  **(178)** | **Flu**  **(202)** | **Pyr**  **(202)** | **BaA**  **(228)** | **Chr**  **(228)** | **BbF**  **(252)** | **BkF**  **(252)** | **BaP**  **(252)** | **Inp**  **(276)** | **BgP**  **(276)** | **DBA**  **(278)** |
| ***Port of Cagliari*** | | | | | | | | | | | | | | | | |
| 1C1 | 23.9 | 14.1 | 5.1 | 4.9 | 43.4 | 14.9 | 147.1 | 157.2 | 95.2 | 102.8 | 287.6 | 96.7 | 193.5 | 212.0 | 200.7 | 42.5 |
| 2C1 | 26.2 | 12.0 | 7.3 | 10.8 | 68.8 | 25.7 | 223.8 | 221.8 | 143.2 | 158.8 | 568.2 | 183.0 | 377.1 | 350.3 | 339.1 | 71.4 |
| 3C1 | 9.4 | 4.4 | 4.2 | 5.3 | 42.5 | 13.9 | 131.1 | 125.9 | 75.4 | 87.7 | 179.3 | 70.0 | 129.9 | 149.7 | 150.2 | 30.6 |
| 1C2 | 598.1 | 435.9 | 303.9 | 656.9 | 2834.7 | 974.1 | 3584.3 | 2963.8 | 2199.4 | 766.8 | 2961.3 | 821.9 | 2365.6 | 1840.4 | 1706.2 | 374.7 |
| 2C2 | 219.6 | 132.5 | 91.4 | 157.4 | 1298.5 | 1146.1 | 7110.5 | 6486.1 | 3311.7 | 2926.4 | 8510.6 | 2023.5 | 6180.5 | 4442.9 | 4047.1 | 914.3 |
| 3C2 | 32.4 | 41.5 | 34.0 | 76.0 | 654.2 | 310.9 | 1771.0 | 1605.4 | 965.3 | 908.8 | 1549.2 | 506.8 | 1221.3 | 1099.8 | 1059.6 | 227.1 |
| 1C3 | 17.7 | 10.7 | 10.0 | 14.3 | 128.7 | 54.9 | 311.1 | 288.7 | 228.3 | 210.3 | 540.1 | 154.2 | 368.7 | 321.7 | 295.5 | 78.1 |
| 2C3 | 7.5 | 1.0 | 9.7 | 11.5 | 122.7 | 26.2 | 237.1 | 205.8 | 128.8 | 139.4 | 225.4 | 68.7 | 160.6 | 115.8 | 108.7 | 29.6 |
| 3C3 | 19.0 | 6.9 | 9.6 | 12.3 | 106.7 | 50.5 | 349.7 | 318.9 | 220.4 | 233.2 | 407.1 | 130.1 | 304.8 | 269.5 | 253.8 | 61.2 |
| 1C4 | 8.8 | 5.9 | 2.9 | 3.5 | 27.9 | 12.8 | 93.0 | 104.2 | 79.6 | 80.2 | 199.4 | 63.2 | 138.4 | 115.0 | 108.0 | 26.0 |
| 2C4 | 11.6 | 6.4 | 4.1 | 5.3 | 49.5 | 17.3 | 143.8 | 128.6 | 90.2 | 100.1 | 305.7 | 95.0 | 198.8 | 166.2 | 159.6 | 37.4 |
| 3C4 | 7.0 | 2.4 | 3.2 | 4.8 | 43.9 | 14.1 | 134.5 | 123.0 | 80.9 | 93.8 | 178.3 | 56.2 | 124.4 | 124.9 | 123.8 | 27.3 |
| 1C5 | 3.9 | 3.4 | 2.0 | 2.6 | 25.6 | 9.5 | 82.5 | 70.5 | 51.5 | 53.3 | 116.9 | 40.0 | 81.4 | 66.1 | 61.9 | 14.8 |
| 2C5 | 9.3 | 3.3 | 2.1 | 3.4 | 29.6 | 9.0 | 89.6 | 75.6 | 53.6 | 60.8 | 194.8 | 63.0 | 125.8 | 114.8 | 108.0 | 25.9 |
| 3C5 | 9.9 | 8.2 | 7.6 | 11.8 | 151.6 | 40.3 | 413.9 | 361.5 | 218.8 | 221.3 | 340.6 | 113.1 | 257.7 | 219.9 | 204.8 | 53.7 |
| ***Port of El Kantaoui*** | | | | | | | | | | | | | | | | |
| 1E1 | 2.5 | 0.3 | 2.3 | 1.0 | 7.5 | 0.9 | 11.1 | 10.6 | 5.0 | 7.5 | 13.3 | 4.1 | 8.3 | 9.1 | 10.8 | 1.6 |
| 2E1 | 2.4 | 0.4 | 1.5 | 1.0 | 8.9 | 1.6 | 17.3 | 19.0 | 8.6 | 13.4 | 34.4 | 10.4 | 22.4 | 22.5 | 31.0 | 6.2 |
| 3E1 | 3.2 | 0.2 | 1.5 | 2.0 | 14.5 | 4.3 | 22.4 | 23.2 | 9.7 | 16.0 | 27.1 | 8.3 | 15.6 | 20.1 | 25.4 | 3.8 |
| 1E2 | 4.9 | 0.4 | 4.0 | 3.4 | 19.2 | 3.1 | 28.9 | 31.5 | 13.2 | 19.4 | 38.1 | 10.7 | 21.3 | 23.6 | 29.5 | 4.1 |
| 2E2 | 3.7 | 0.3 | 2.4 | 3.6 | 17.7 | 3.6 | 39.3 | 42.4 | 18.4 | 27.1 | 68.2 | 20.4 | 35.9 | 34.4 | 43.3 | 6.6 |
| 3E2 | 3.4 | 0.3 | 0.6 | 1.4 | 9.7 | 1.6 | 20.0 | 22.7 | 9.0 | 13.6 | 21.9 | 6.4 | 12.2 | 15.4 | 20.3 | 2.8 |
| 1E3 | 2.7 | 0.2 | 0.2 | 0.2 | 1.1 | 0.3 | 2.7 | 2.7 | 1.3 | 2.2 | 3.4 | 0.9 | 2.0 | 2.2 | 3.0 | 0.4 |
| 2E3 | 2.9 | 0.2 | 0.5 | 0.6 | 3.7 | 0.5 | 6.4 | 5.0 | 2.2 | 4.4 | 10.1 | 3.0 | 4.4 | 5.8 | 7.3 | 1.0 |
| 3E3 | 3.2 | 0.3 | 0.2 | 0.5 | 2.6 | 0.6 | 7.2 | 7.7 | 3.2 | 5.3 | 11.1 | 3.3 | 6.1 | 8.5 | 10.9 | 1.5 |
| ***Port of Heraklion*** | | | | | | | | | | | | | | | | |
| 1H1 | 4.7 | 1.6 | 6.7 | 7.3 | 97.6 | 22.3 | 202.6 | 177.0 | 114.7 | 116.2 | 207.7 | 65.8 | 148.1 | 112.7 | 104.3 | 28.2 |
| 2H1 | 2.5 | 1.2 | 5.9 | 4.9 | 64.6 | 15.1 | 172.4 | 149.4 | 99.1 | 111.3 | 276.7 | 89.9 | 183.2 | 129.5 | 119.9 | 33.1 |
| 3H1 | 8.7 | 1.1 | 11.2 | 13.2 | 142.9 | 30.4 | 279.0 | 242.7 | 151.8 | 164.4 | 265.8 | 81.3 | 190.0 | 137.6 | 129.3 | 35.1 |
| 1H3 | 1.6 | 0.1 | 1.3 | 1.1 | 16.3 | 3.8 | 33.3 | 28.0 | 14.8 | 16.3 | 26.9 | 8.8 | 18.6 | 13.9 | 14.1 | 3.3 |
| 2H3 | 2.0 | 0.1 | 0.1 | 0.7 | 9.5 | 1.8 | 25.2 | 18.8 | 6.9 | 11.2 | 25.3 | 8.0 | 12.8 | 10.8 | 12.2 | 2.4 |
| 3H3 | 2.3 | 0.1 | 0.5 | 0.7 | 7.2 | 1.3 | 12.3 | 11.8 | 5.2 | 7.3 | 12.5 | 3.6 | 7.1 | 6.8 | 8.4 | 1.5 |
| 1H4 | 1.9 | 0.5 | 0.8 | 0.7 | 8.7 | 1.5 | 18.0 | 19.4 | 7.5 | 11.6 | 18.1 | 5.9 | 10.7 | 10.4 | 11.8 | 2.4 |
| 2H4 | 4.0 | 0.3 | 0.6 | 1.5 | 15.6 | 2.0 | 23.8 | 22.8 | 7.4 | 14.8 | 34.7 | 10.6 | 19.0 | 17.5 | 20.1 | 3.6 |
| 3H4 | 2.9 | 0.4 | 2.4 | 3.1 | 31.6 | 6.1 | 51.7 | 60.1 | 23.2 | 32.5 | 44.4 | 14.2 | 30.0 | 23.3 | 23.8 | 5.4 |
| 1H5 | 18.8 | 2.6 | 11.4 | 8.0 | 77.7 | 6.9 | 96.7 | 82.7 | 22.1 | 55.0 | 61.5 | 13.0 | 29.4 | 30.7 | 42.4 | 5.1 |
| 2H5 | 10.9 | 1.7 | 3.9 | 9.9 | 67.2 | 5.0 | 103.9 | 86.9 | 20.4 | 65.7 | 102.5 | 25.9 | 39.7 | 40.9 | 49.8 | 6.5 |
| 3H5 | 6.1 | 5.9 | 7.4 | 12.0 | 137.7 | 32.5 | 348.7 | 303.8 | 169.3 | 172.6 | 257.1 | 84.1 | 181.5 | 125.8 | 109.7 | 32.9 |
